# Supplementary material for: Comprehensive Metabolite Fingerprinting of Australian Black and Green Olives and Their Antioxidant and Pharmacokinetics Properties
Source: MDPI journal article supplement (doi:10.3390/separations10060354), 2023-06-13
Supplement: s1 [file s1]

*Supplementary Material*

**Comprehensive Metabolites Fingerprinting of Australian Black and Green Olives and Their Antioxidant and Pharmacokinetics Properties**

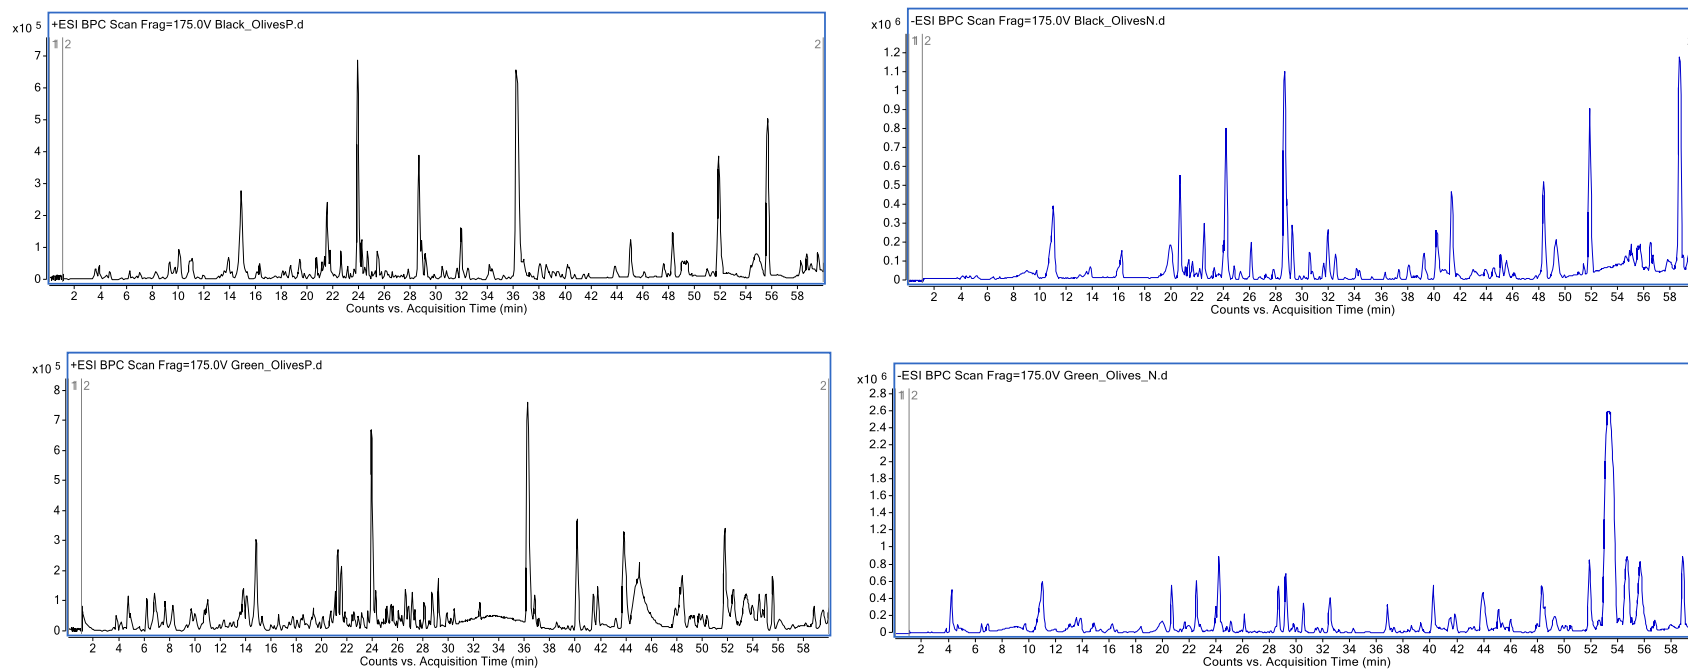

**Figure S1.** Base peak chromatograms (BPC) of black and green olives in positive (black) and negative (blue) modes

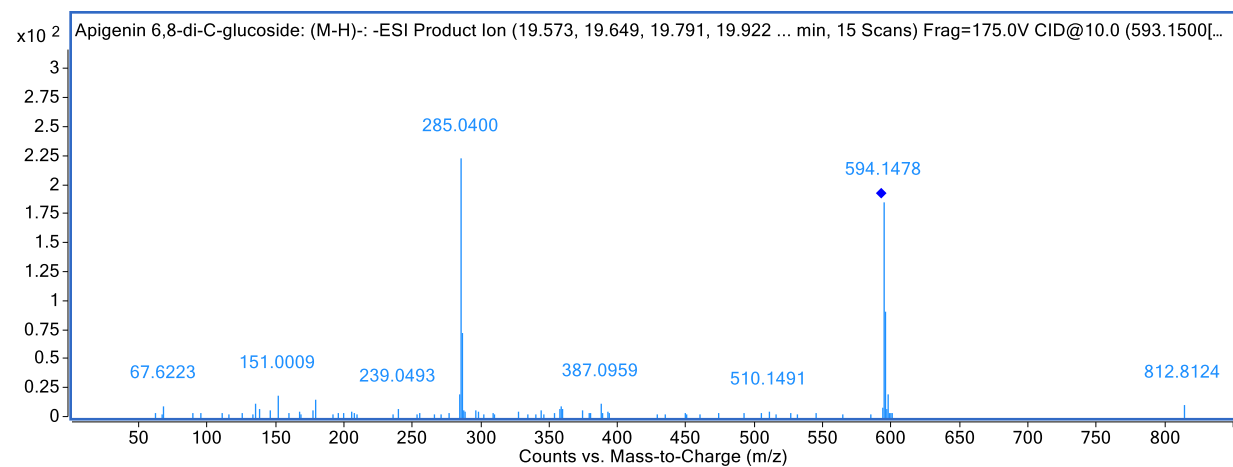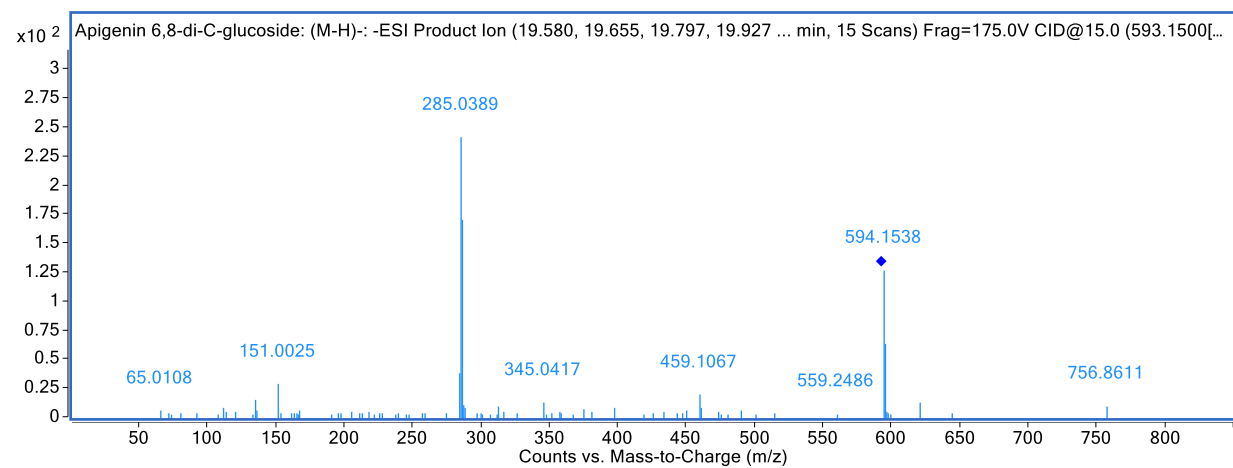

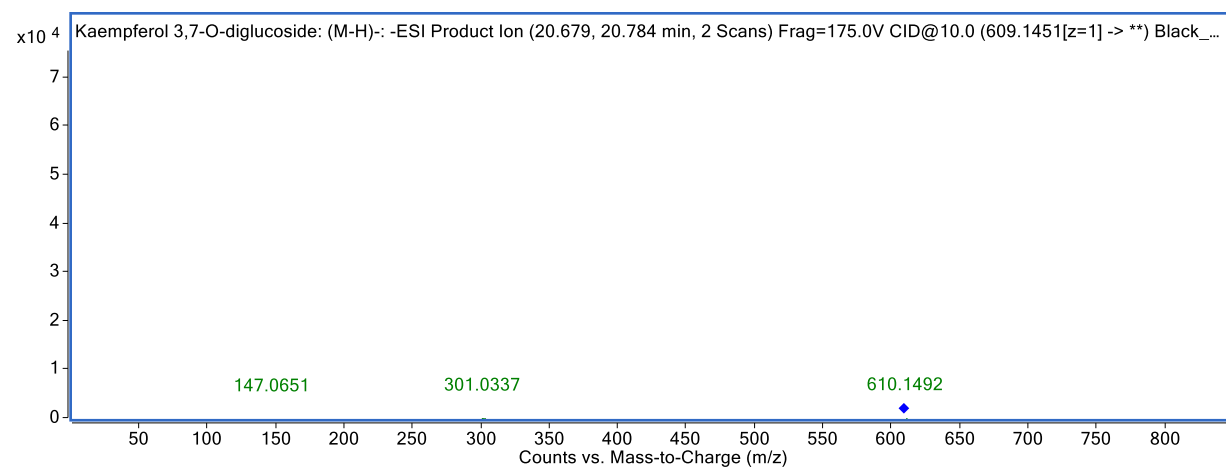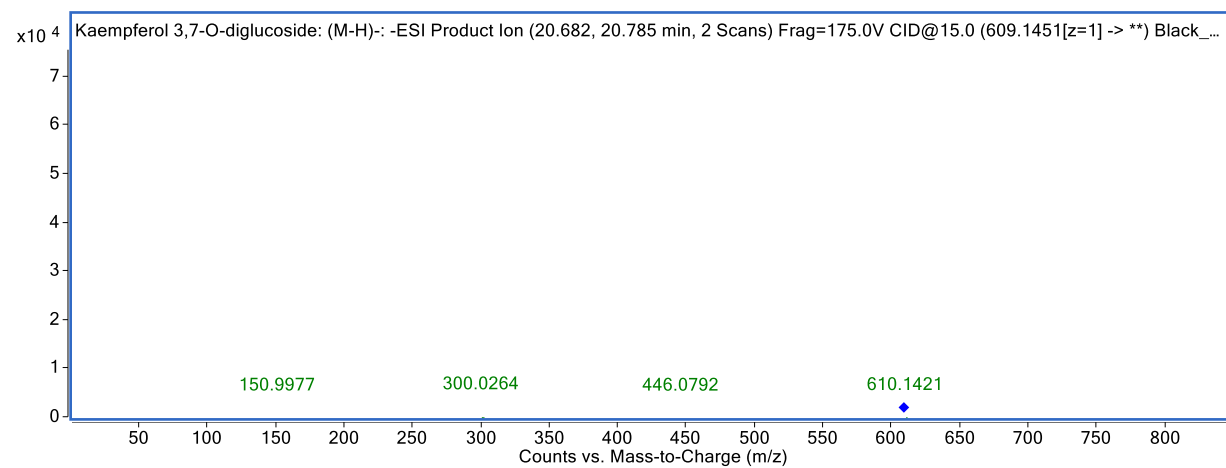

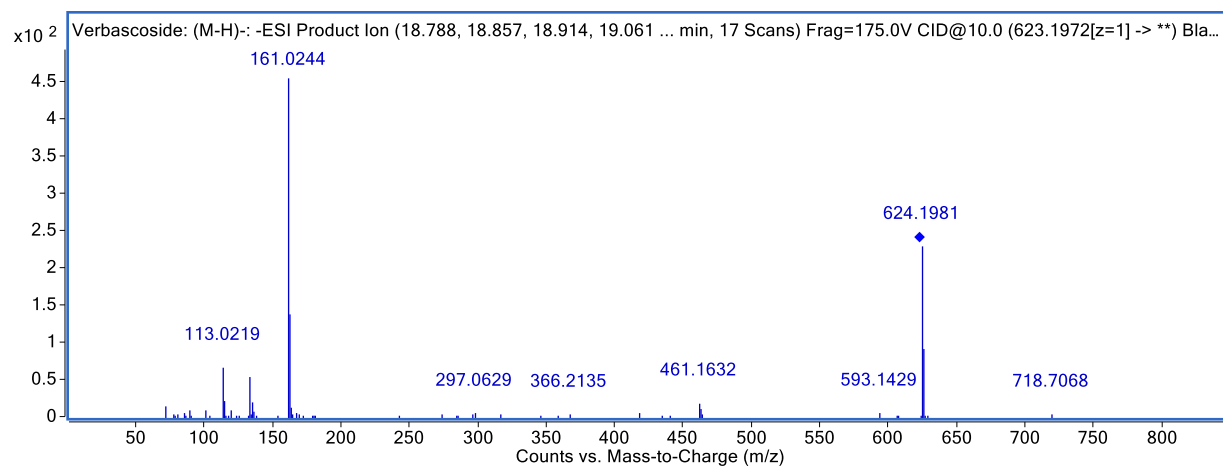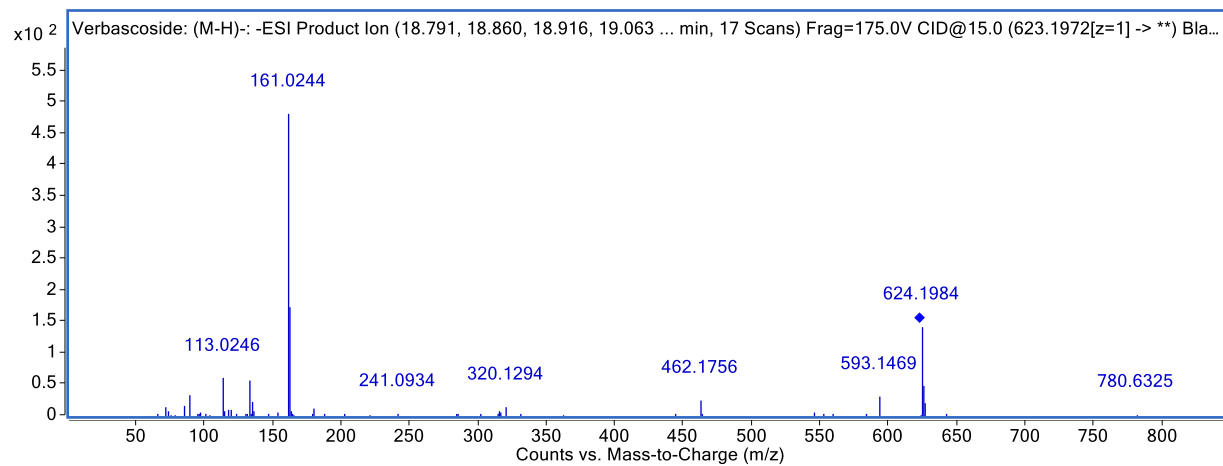

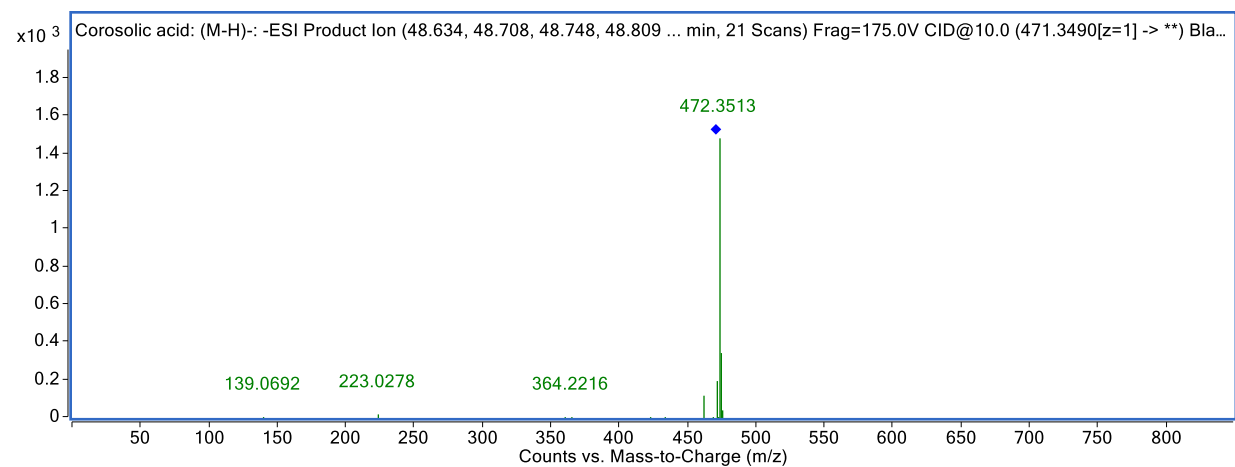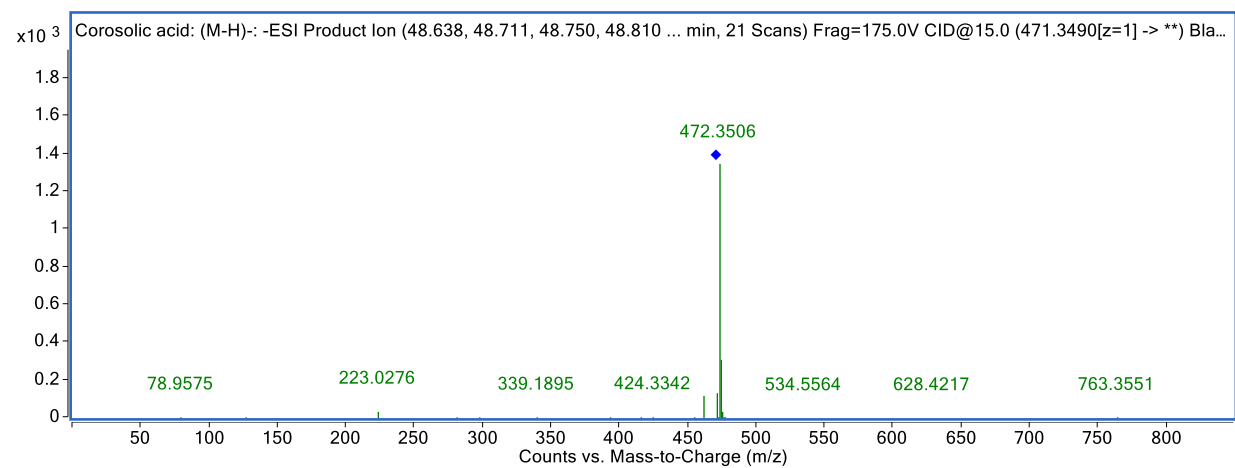

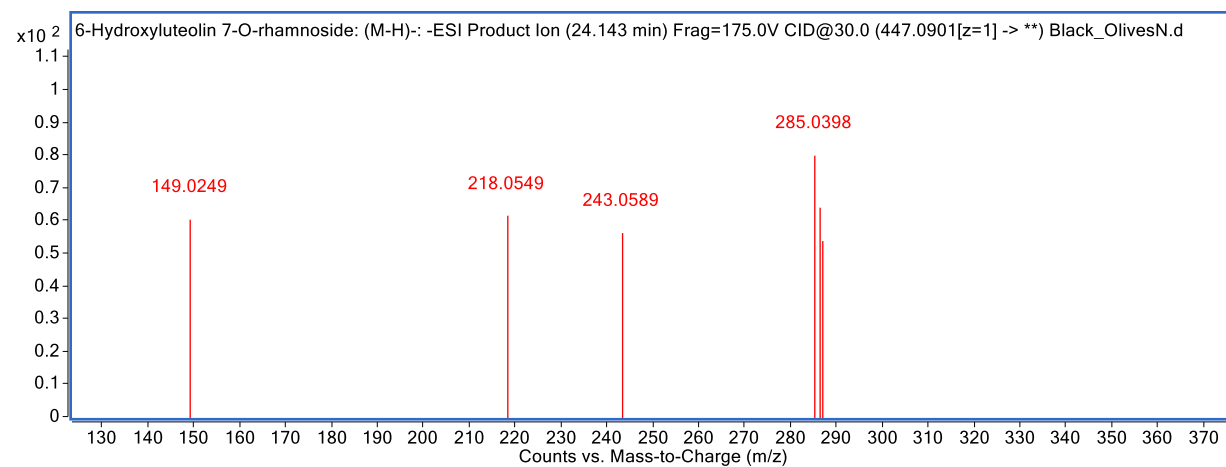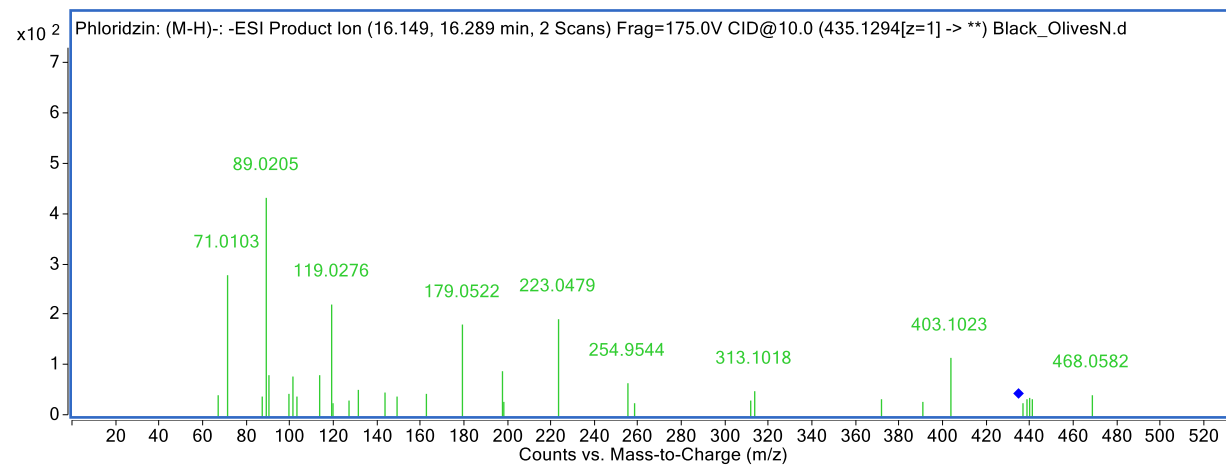

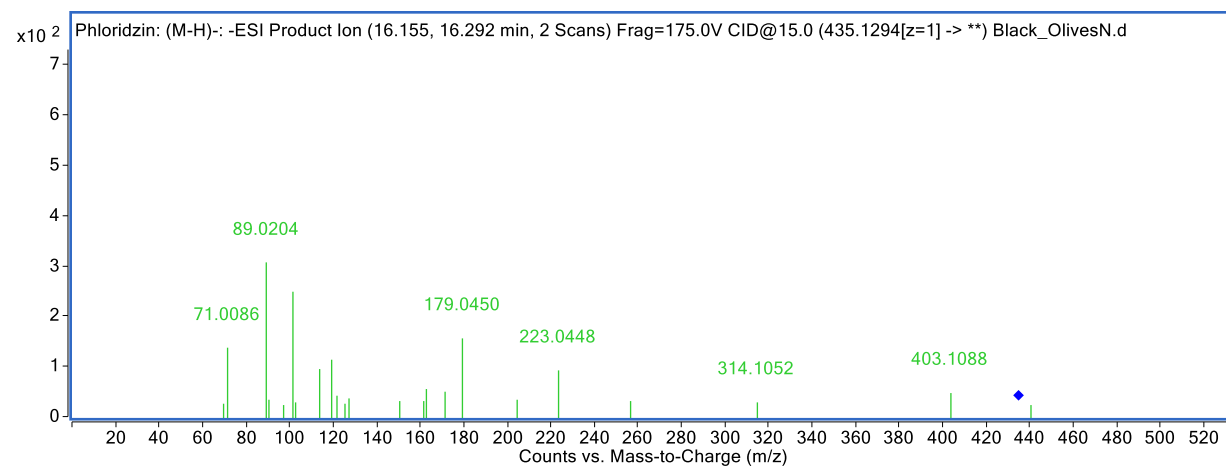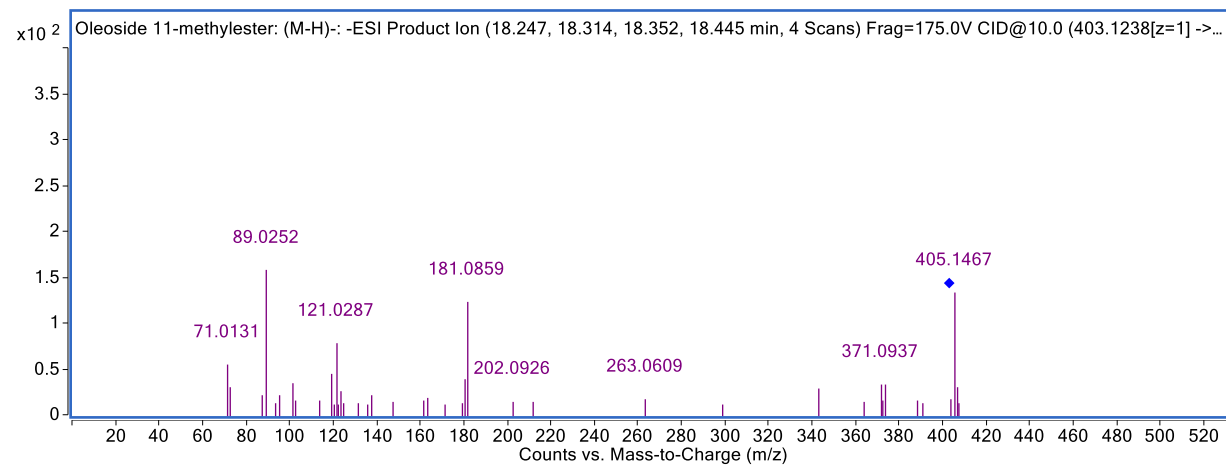

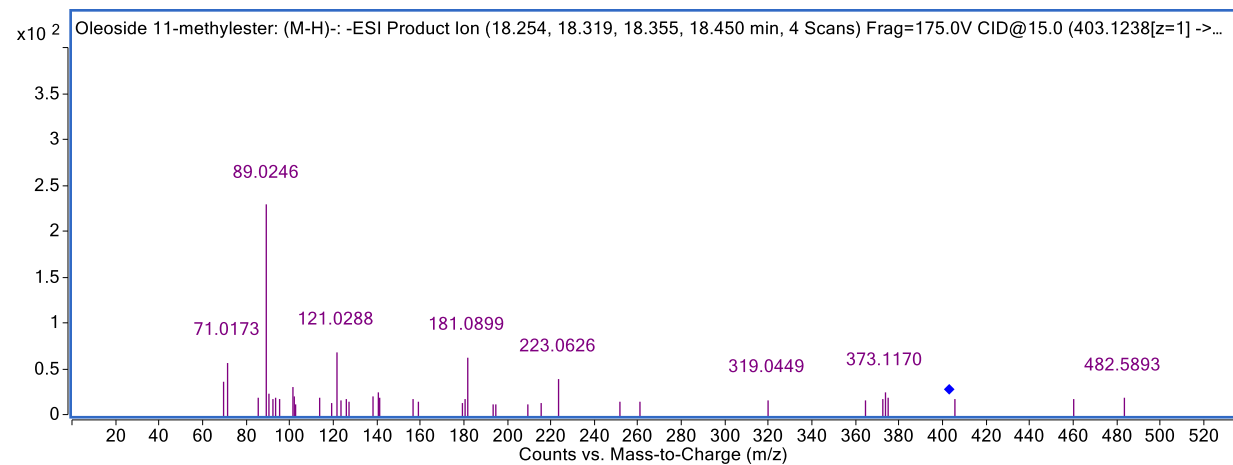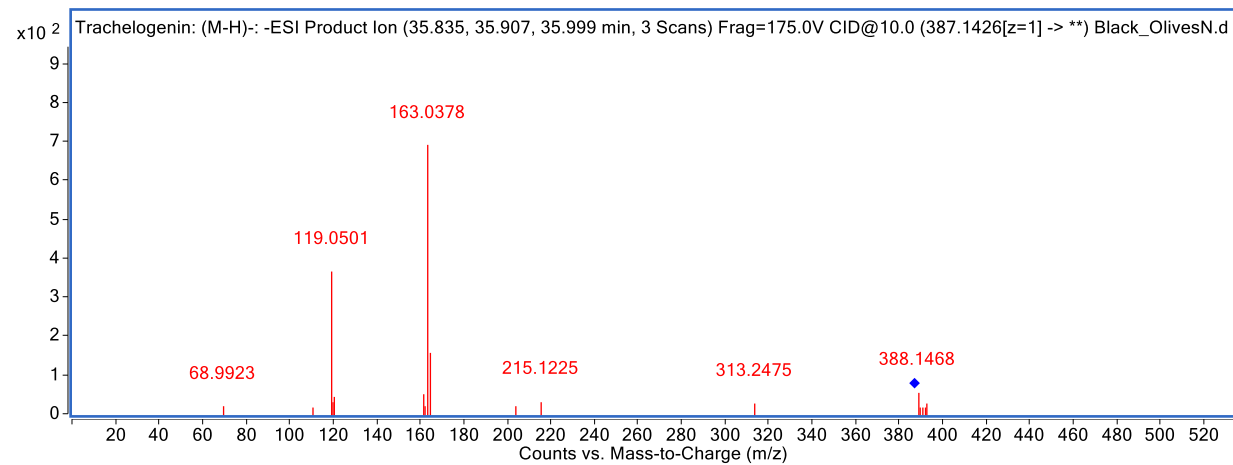



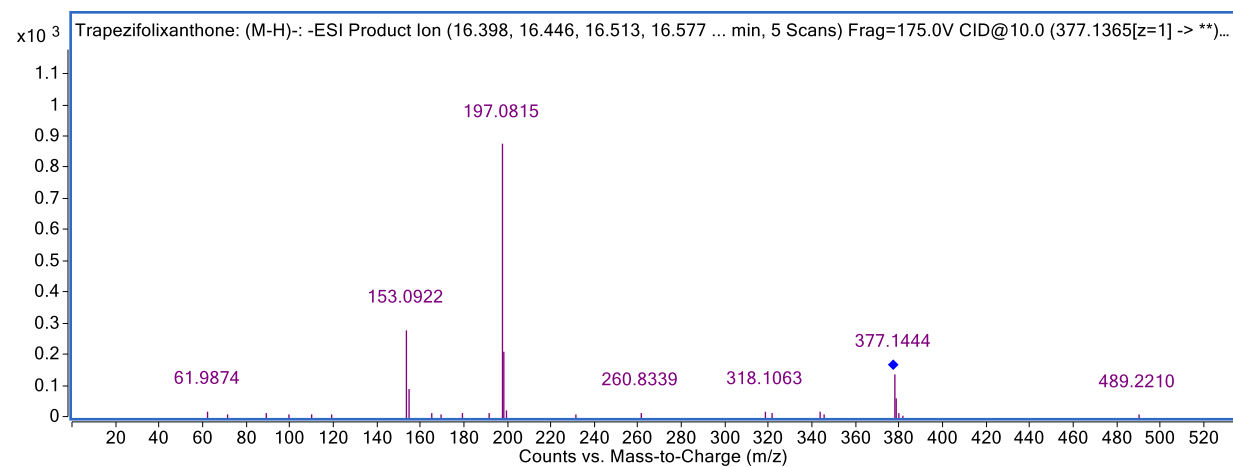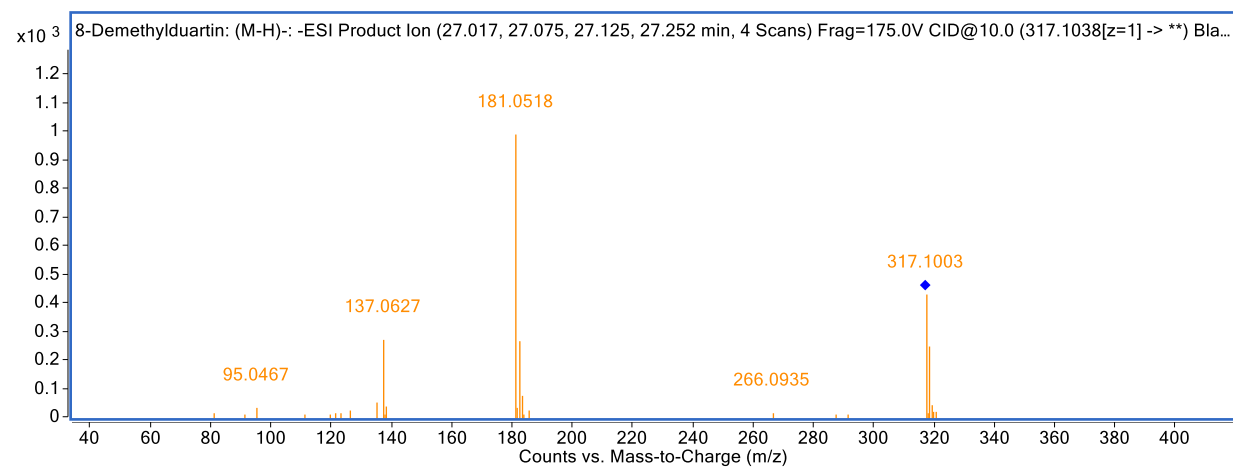

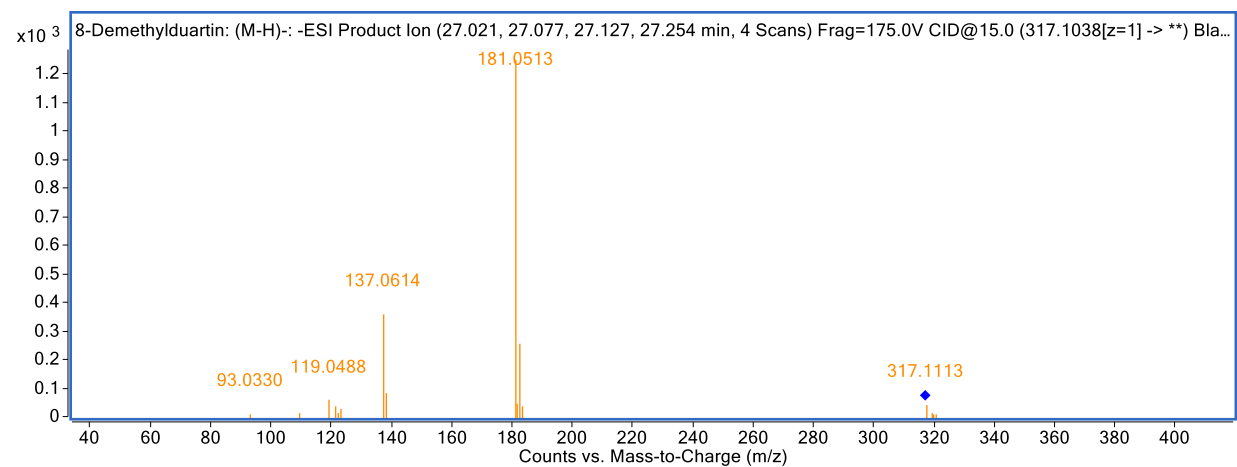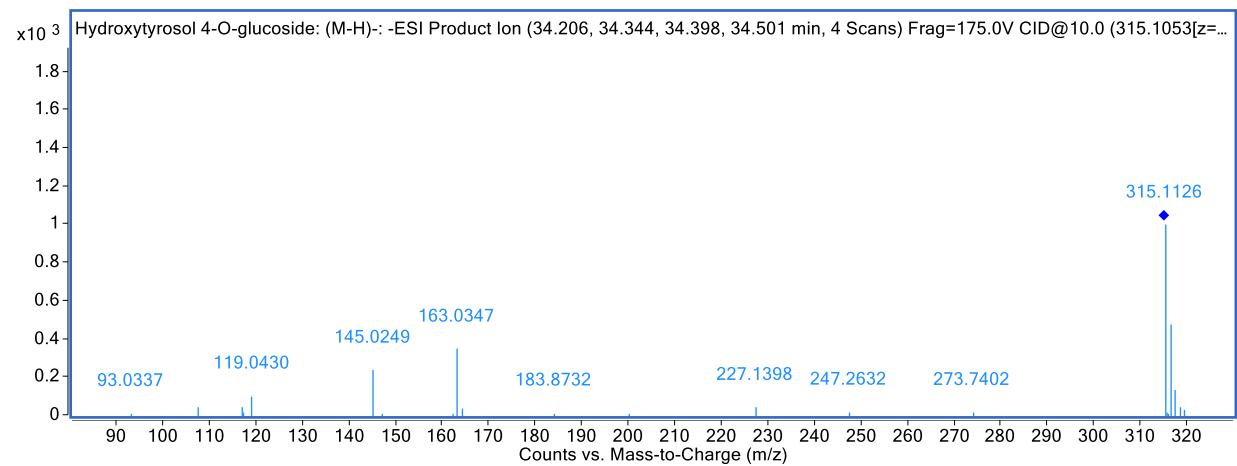

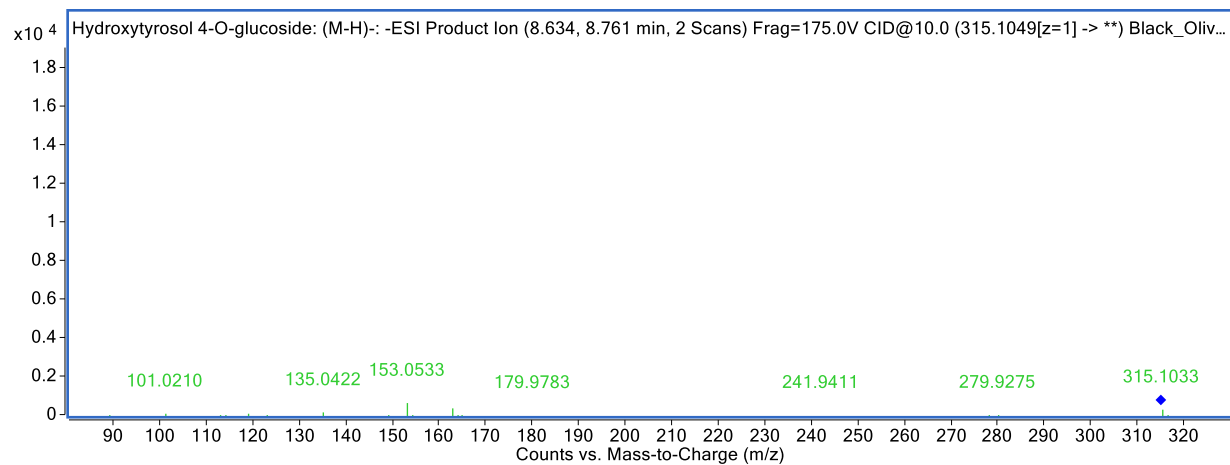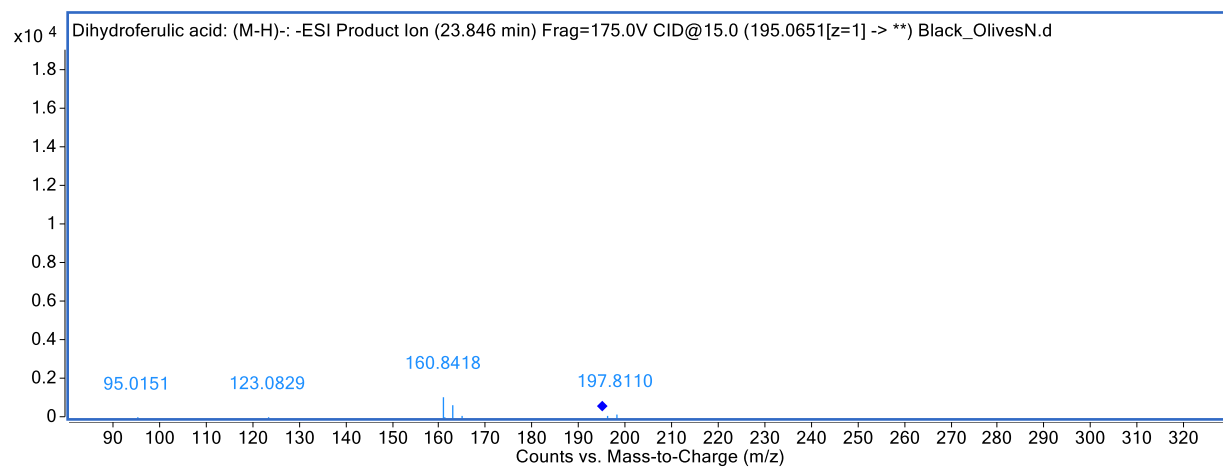

Vaccinoside

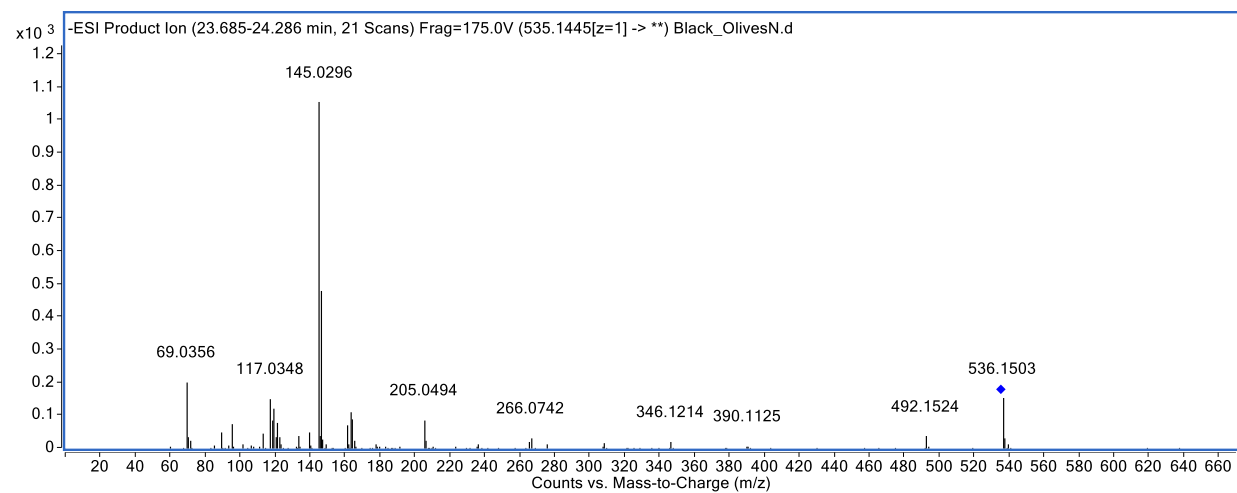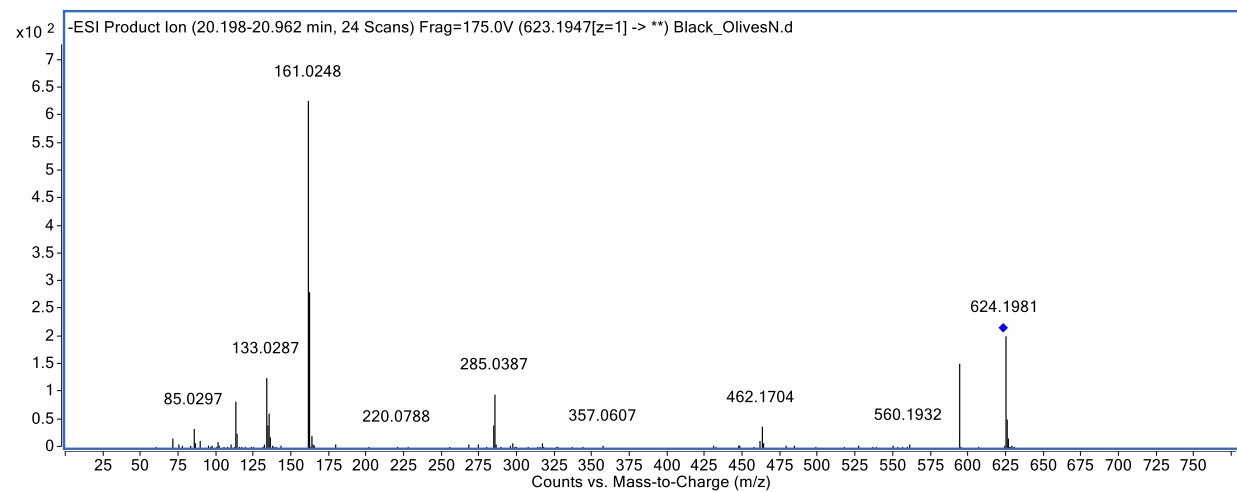

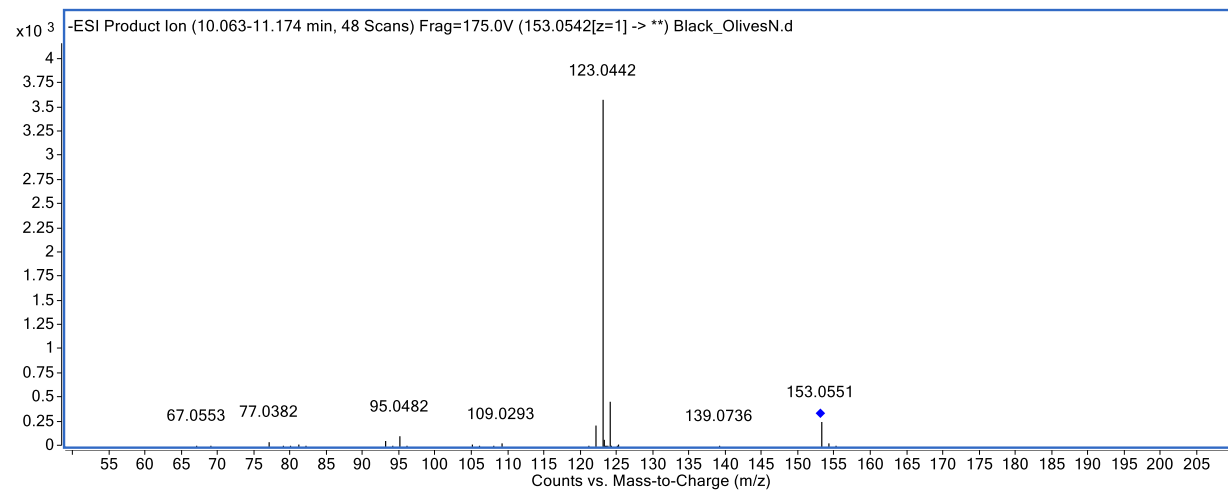

### Syringic acid

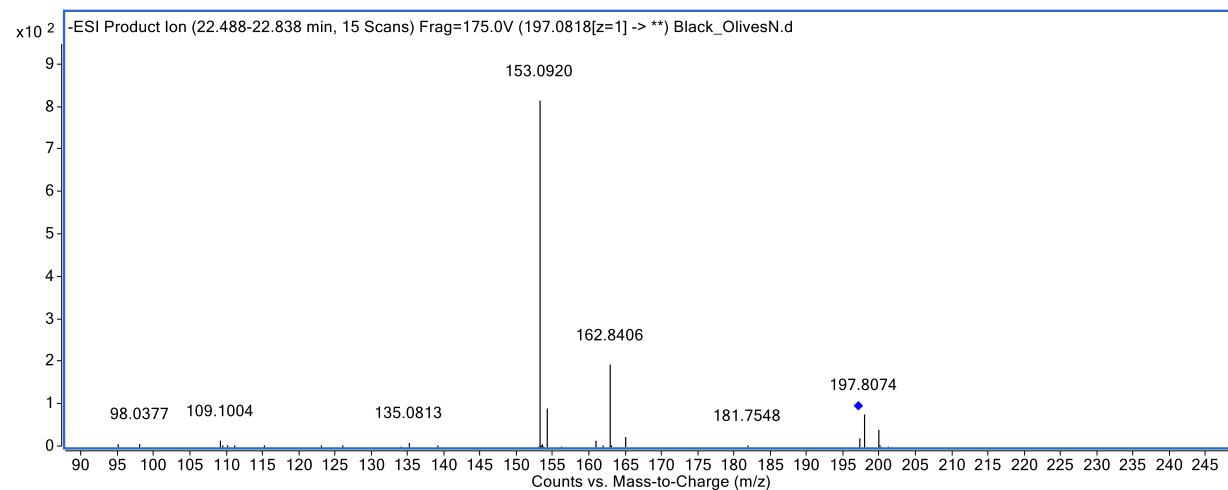

# Luteolin

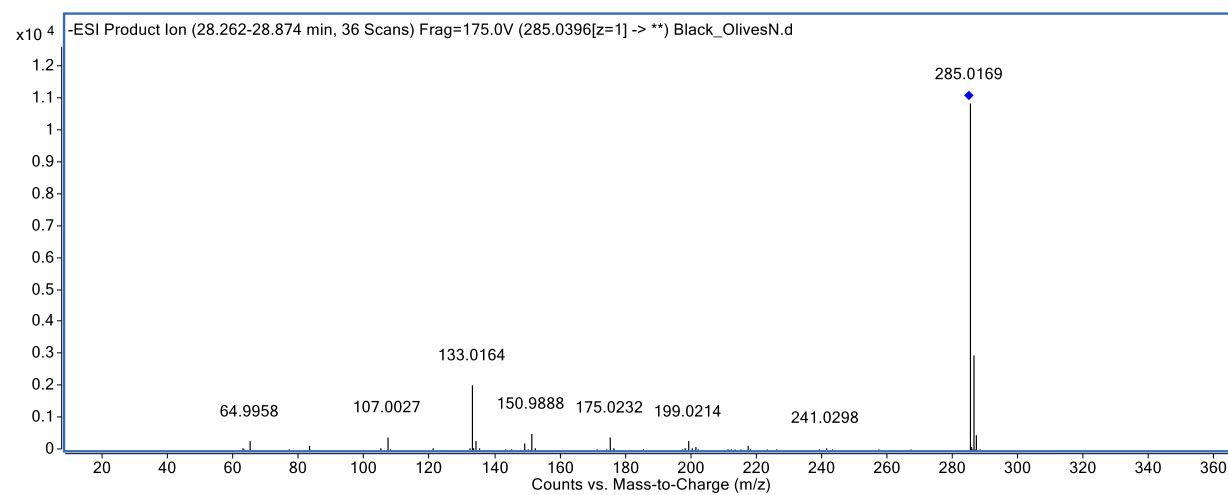

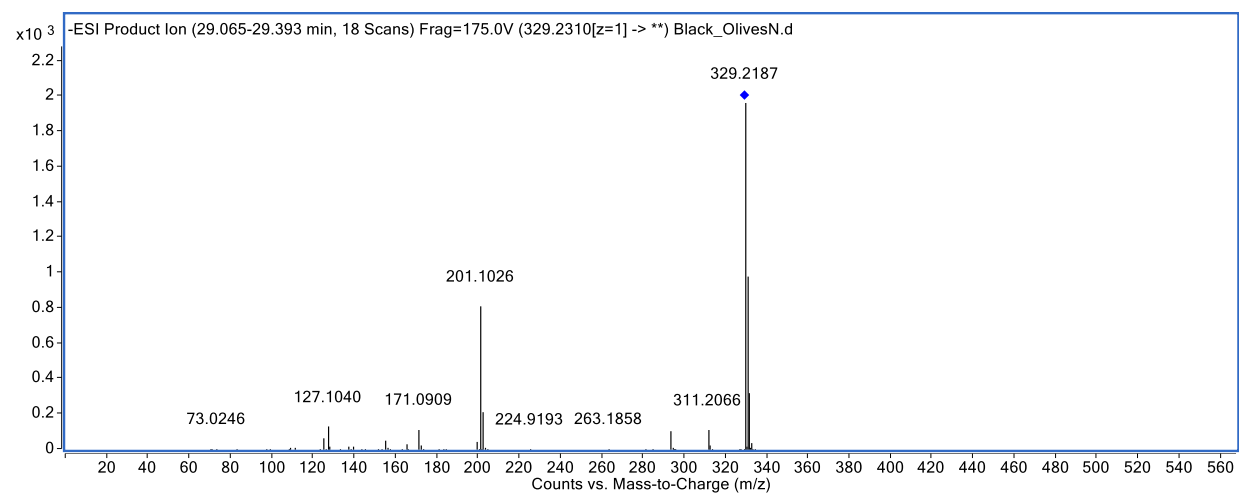

Ricinoleic acid

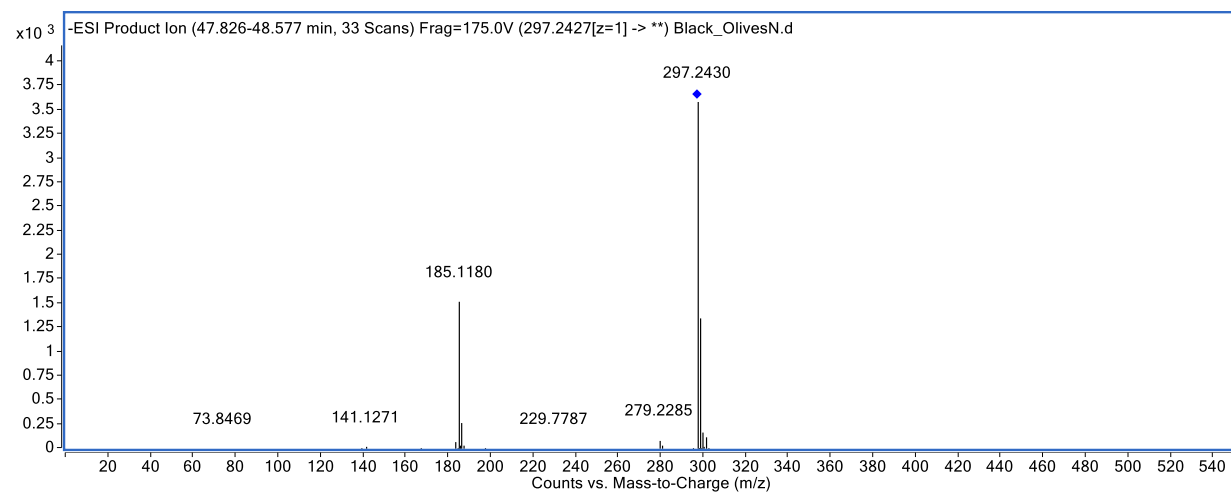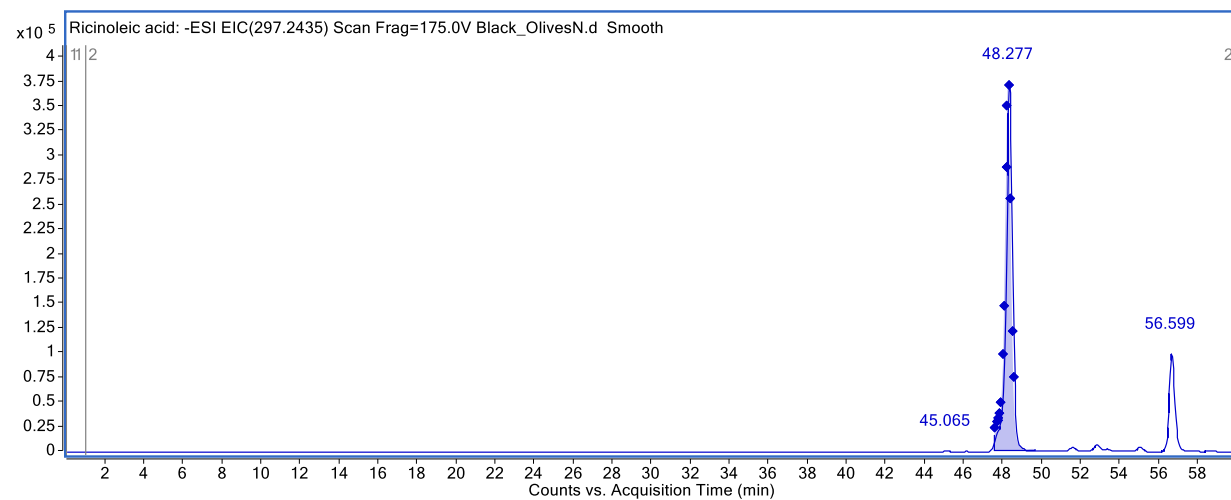

2-Hydroxystearic acid



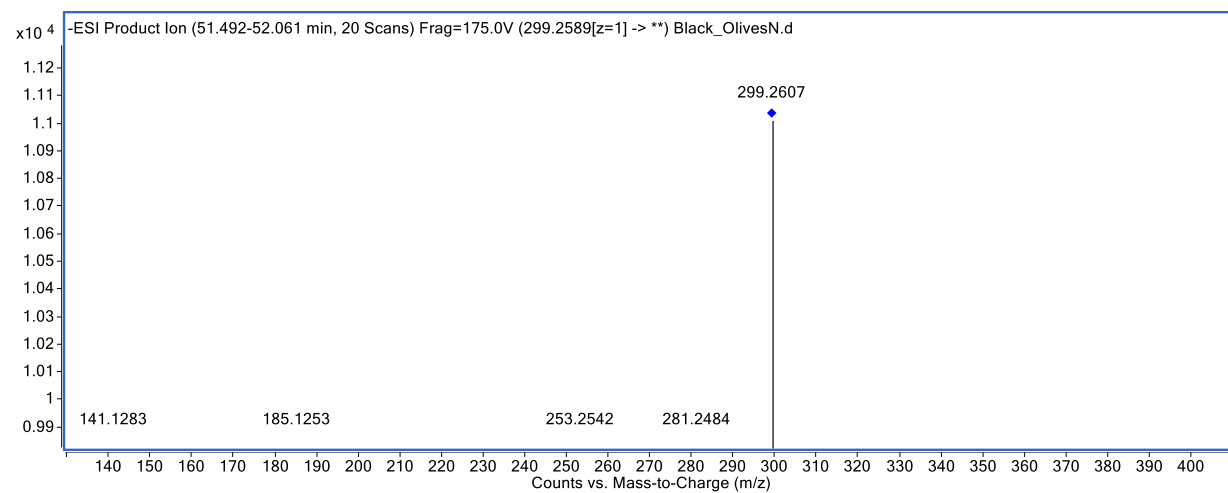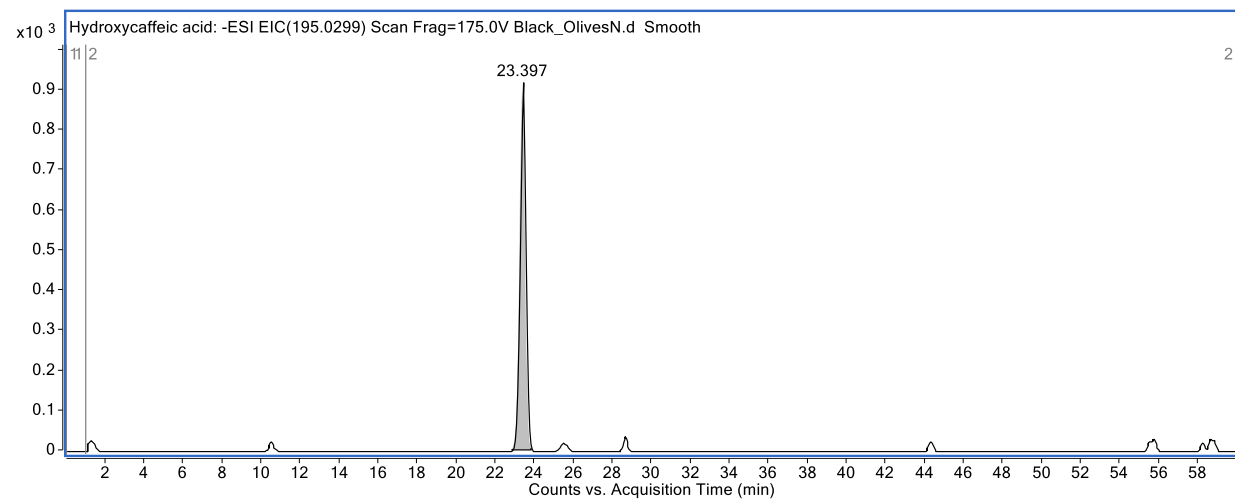

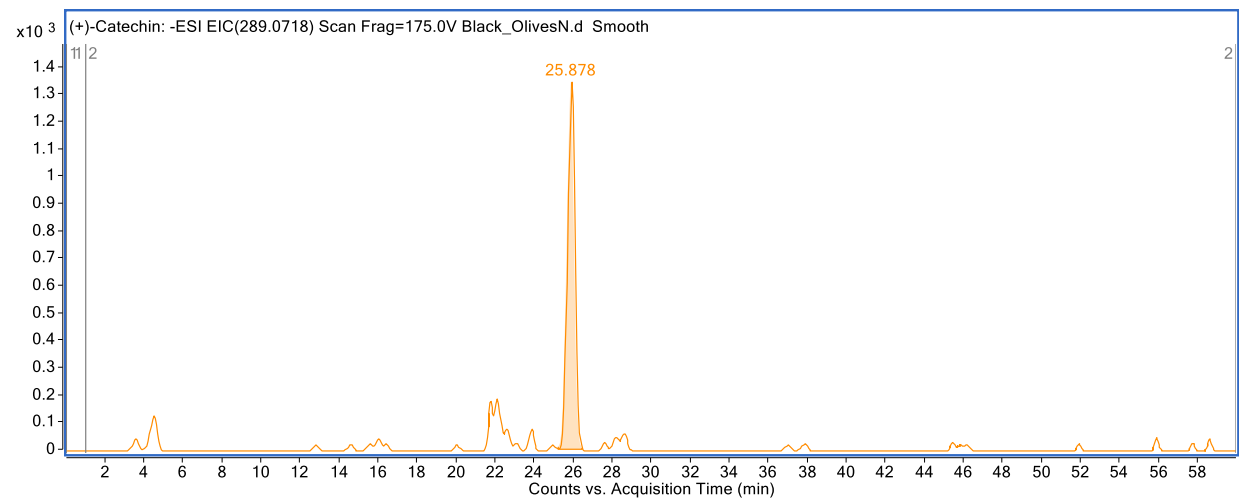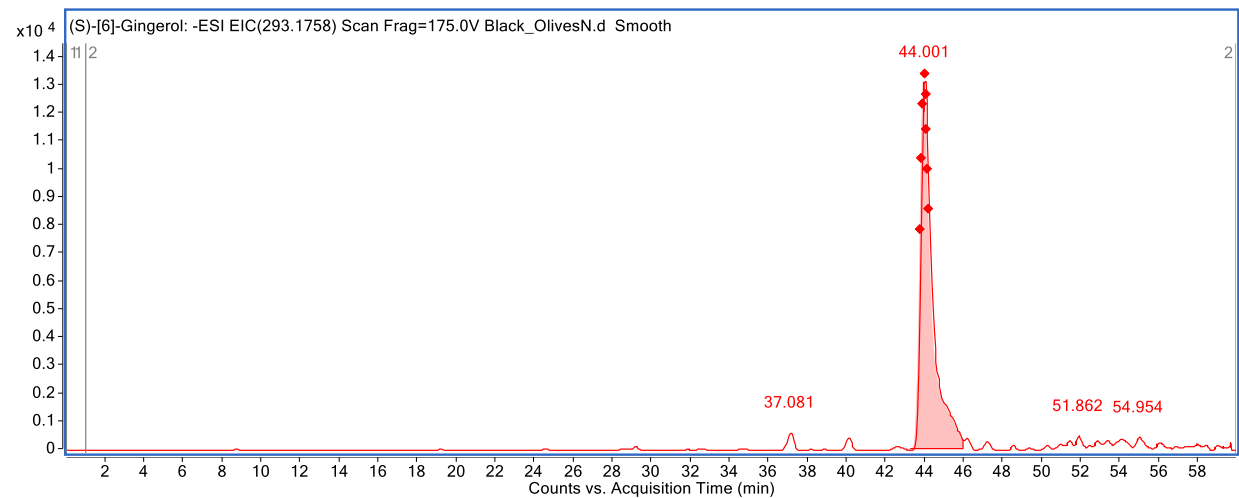

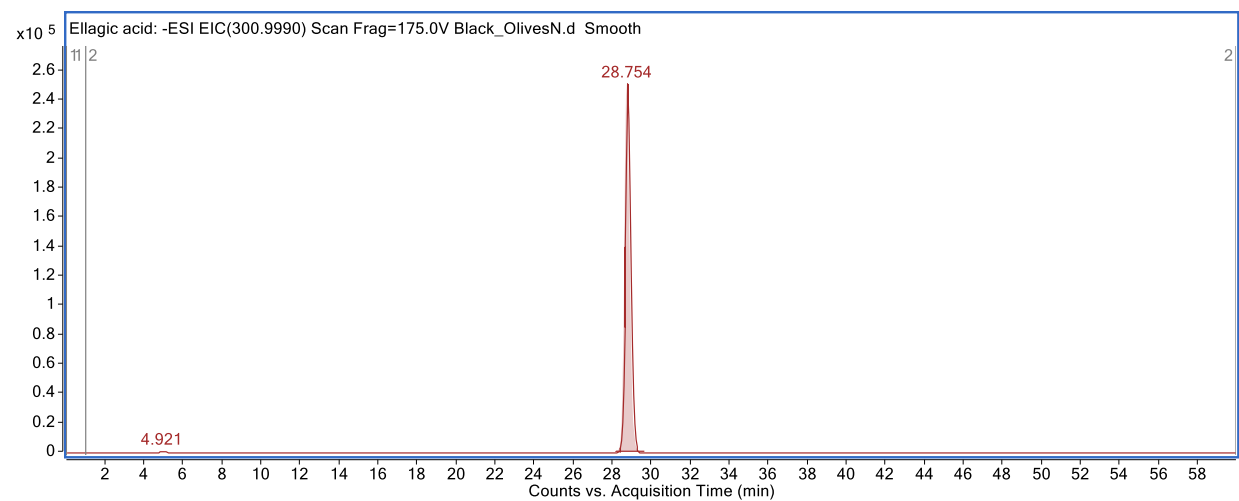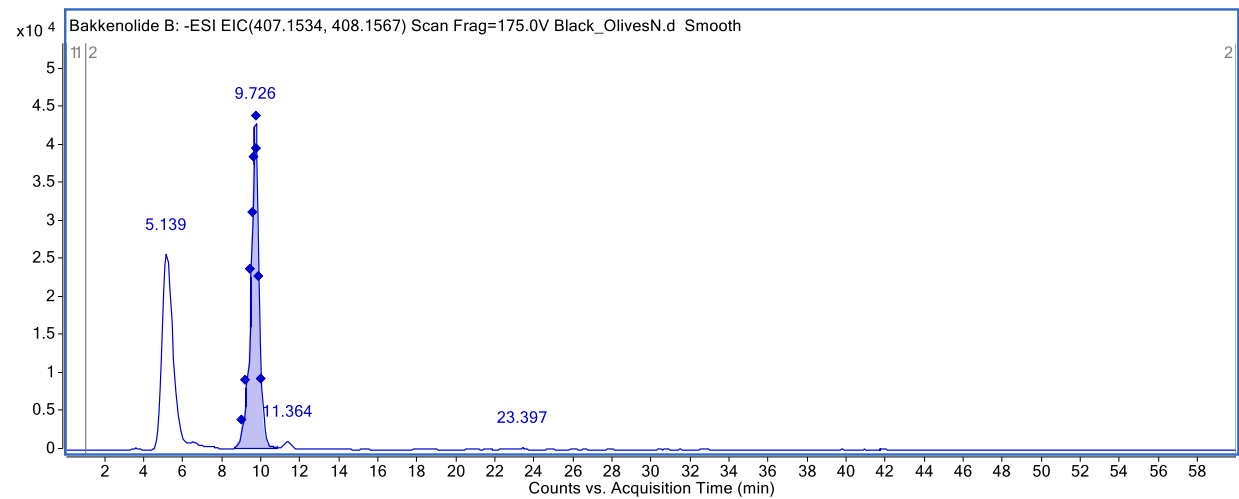

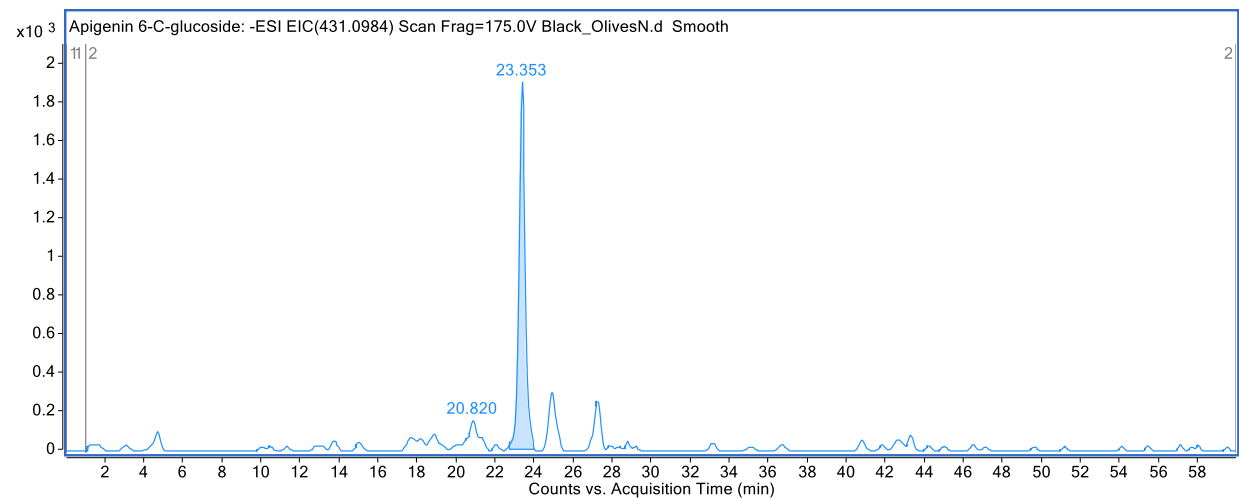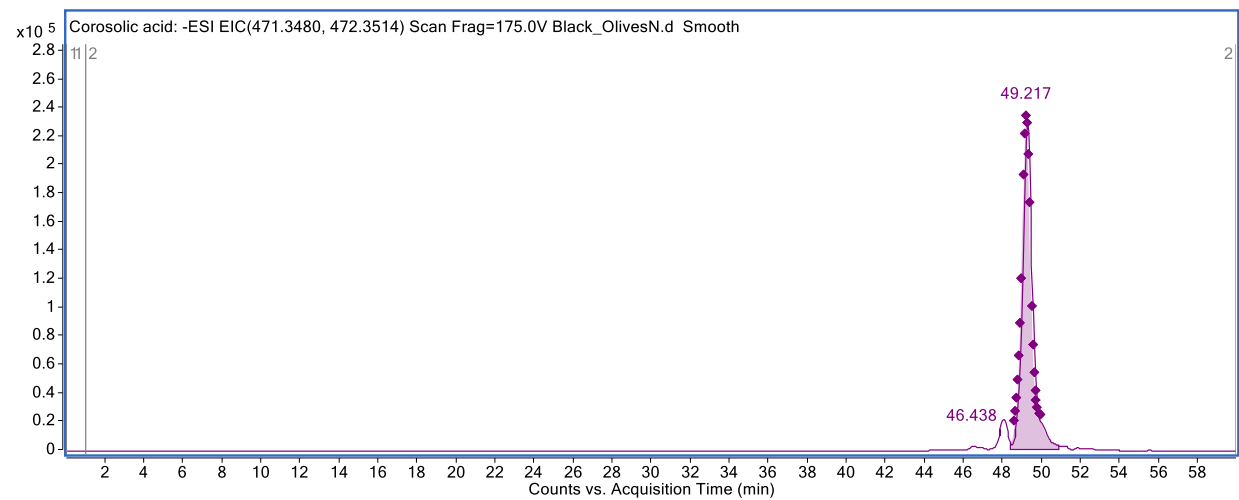

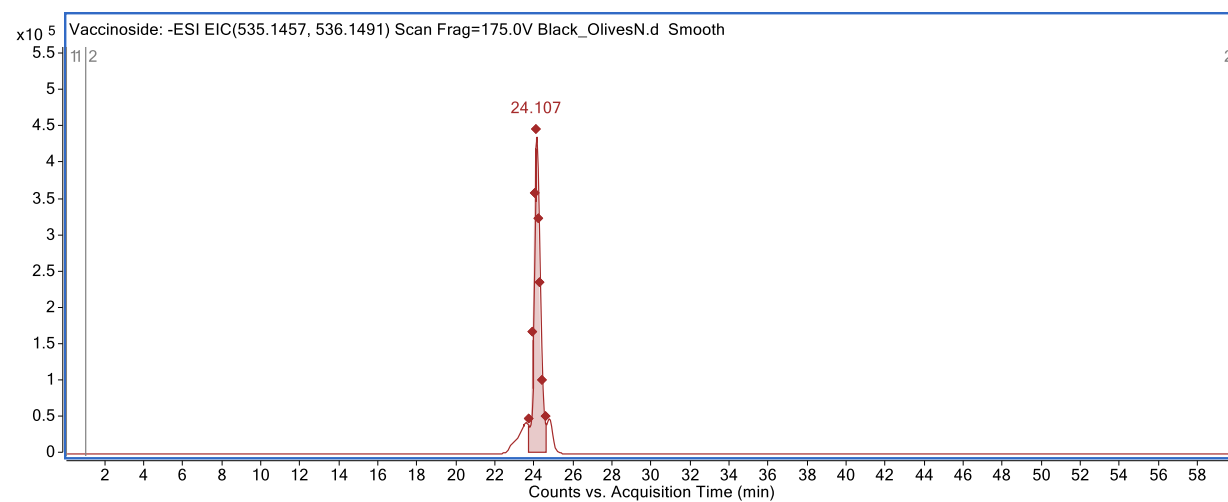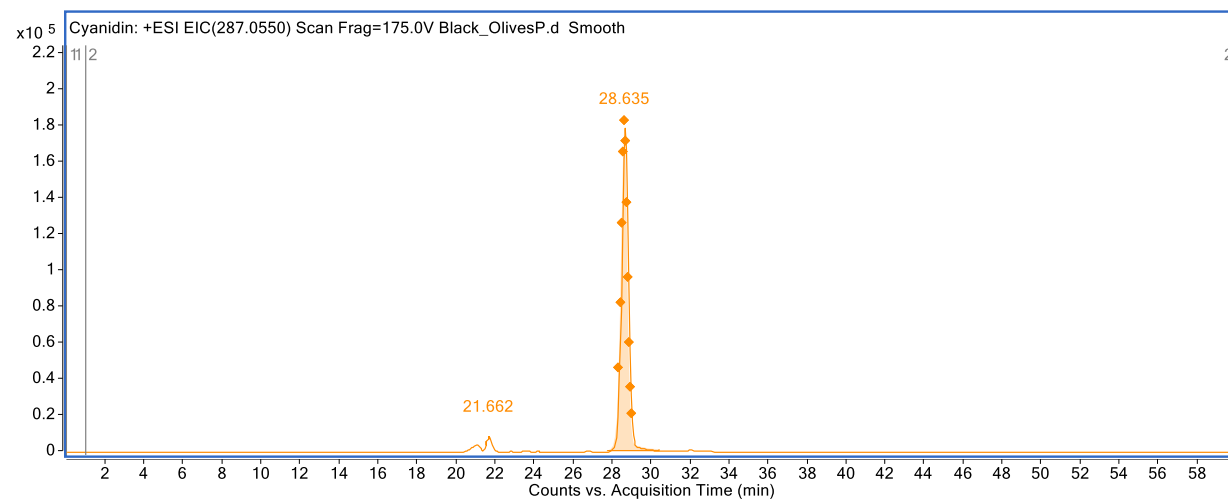

**Figure S2.** Chromatograms and MS/MS spectra of some selected compounds

**Table S1.** Radar bioavailability properties of selected compounds

| No. | Compounds                | MW     | Rotatable bonds | XLOGP3 | TPSA   | WLOGP | ESOL Log S | Fraction Csp3 | Lipinski violations | Bioavailability Score |
|-----|--------------------------|--------|-----------------|--------|--------|-------|------------|---------------|---------------------|-----------------------|
| 1   | 3-p-Coumaroylquinic acid | 338.31 | 5               | -0.07  | 144.52 | -0.46 | -1.75      | 0.38          | 0                   | 0.56                  |
| 2   | Caffeic acid             | 180.16 | 2               | 1.15   | 77.76  | 1.09  | -1.89      | 0.00          | 0                   | 0.56                  |
| 3   | Chlorogenic acid         | 354.31 | 5               | -0.42  | 164.75 | -0.75 | -1.62      | 0.38          | 1                   | 0.11                  |
| 4   | Cinnamic acid            | 148.16 | 2               | 2.13   | 37.30  | 1.68  | -2.37      | 0.00          | 0                   | 0.85                  |
| 5   | Ellagic acid             | 302.19 | 0               | 1.1    | 141.34 | 1.31  | -2.94      | 0.00          | 0                   | 0.55                  |
| 6   | Ferulic acid             | 194.18 | 3               | 1.51   | 66.76  | 1.39  | -2.11      | 0.10          | 0                   | 0.85                  |
| 7   | p-Coumaric acid          | 164.16 | 2               | 1.46   | 57.53  | 1.38  | -2.02      | 0.00          | 0                   | 0.85                  |
| 8   | p-Hydroxybenzoic acid    | 138.12 | 1               | 1.58   | 57.53  | 1.09  | -2.07      | 0.00          | 0                   | 0.85                  |
| 9   | Protocatechuic acid      | 154.12 | 1               | 1.15   | 77.76  | 0.80  | -1.86      | 0.00          | 0                   | 0.56                  |
| 10  | Quinic acid              | 192.17 | 1               | -2.37  | 118.22 | -2.32 | 0.53       | 0.86          | 0                   | 0.56                  |
| 11  | Syringic acid            | 198.17 | 3               | 1.04   | 75.99  | 1.11  | -1.84      | 0.22          | 0                   | 0.56                  |
| 12  | Cyanidin                 | 287.24 | 1               | 0.77   | 114.29 | 2.91  | -2.6       | 0.00          | 0                   | 0.55                  |
| 13  | Cyanidin 3-O-rutinoside  | 595.53 | 6               | -2.68  | 252.36 | -0.77 | -1.73      | 0.44          | 3                   | 0.17                  |
| 14  | Cyanidin 3-O-glucoside   | 449.38 | 4               | 0.14   | 193.44 | 0.38  | -2.82      | 0.29          | 2                   | 0.17                  |
| 15  | Delphinidin              | 303.24 | 1               | 0.41   | 134.52 | 2.61  | -2.45      | 0.00          | 1                   | 0.55                  |
| 16  | Chrysin                  | 254.24 | 1               | 3.52   | 70.67  | 2.87  | -4.19      | 0.00          | 0                   | 0.55                  |
| 17  | Diosmin                  | 608.54 | 7               | 0.14   | 238.20 | -1.09 | -3.51      | 0.46          | 3                   | 0.17                  |
| 18  | Epicatechin              | 290.27 | 1               | 0.36   | 110.38 | 1.22  | -2.22      | 0.20          | 0                   | 0.55                  |
| 19  | Isorhamnetin             | 316.26 | 2               | 1.87   | 120.36 | 2.29  | -3.36      | 0.06          | 0                   | 0.55                  |
| 20  | Luteolin                 | 286.24 | 1               | 2.53   | 111.13 | 2.28  | -3.71      | 0.00          | 0                   | 0.55                  |
| 21  | Naringin                 | 580.53 | 6               | -0.44  | 225.06 | -1.49 | -2.98      | 0.52          | 3                   | 0.17                  |
| 22  | Quercetin                | 302.24 | 1               | 1.54   | 131.36 | 1.99  | -3.16      | 0.00          | 0                   | 0.55                  |
| 23  | Quercetin-3-glucoside    | 464.38 | 4               | 0.36   | 210.51 | -0.54 | -3.04      | 0.29          | 2                   | 0.17                  |
| 24  | Taxifolin                | 304.25 | 1               | 0.95   | 127.45 | 0.86  | -2.66      | 0.13          | 0                   | 0.55                  |
| 25  | Rutin                    | 610.52 | 6               | -0.33  | 269.43 | -1.69 | -3.3       | 0.44          | 3                   | 0.17                  |
| 26  | Coumarin                 | 146.14 | 0               | 1.39   | 30.21  | 1.79  | -2.29      | 0.00          | 0                   | 0.55                  |
| 27  | Pyrogallol               | 126.11 | 0               | 0.52   | 60.69  | 0.80  | -1.44      | 0.00          | 0                   | 0.55                  |
| 28  | Corosolic acid           | 472.7  | 1               | 6.37   | 77.76  | 6.06  | -6.72      | 0.90          | 1                   | 0.56                  |
| 29  | Hesperidin               | 610.56 | 7               | -0.14  | 234.29 | -1.48 | -3.28      | 0.54          | 3                   | 0.17                  |
| 30  | Neohesperidin            | 596.53 | 6               | -0.8   | 245.29 | -1.78 | -2.85      | 0.52          | 3                   | 0.17                  |
| 31  | Tricin                   | 330.29 | 3               | 3.07   | 109.36 | 2.59  | -4.12      | 0.12          | 0                   | 0.55                  |
| 32  | Quercitrin               | 448.38 | 3               | 0.86   | 190.28 | 0.49  | -3.33      | 0.29          | 2                   | 0.17                  |
| 33  | Naringenin               | 272.25 | 1               | 2.52   | 86.99  | 2.19  | -3.49      | 0.13          | 0                   | 0.55                  |

|    |                              |        |    |       |        |       |       |      |   |      |
|----|------------------------------|--------|----|-------|--------|-------|-------|------|---|------|
| 34 | Eriodictyol                  | 288.25 | 1  | 2.02  | 107.22 | 1.89  | -3.26 | 0.13 | 0 | 0.55 |
| 35 | Linoleic acid                | 280.45 | 14 | 6.98  | 37.30  | 5.88  | -5.05 | 0.72 | 1 | 0.85 |
| 36 | Oleic acid                   | 282.45 | 15 | 7.64  | 37.30  | 6.11  | -5.41 | 0.83 | 1 | 0.85 |
| 37 | Hydroxytyrosol 4-O-glucoside | 316.3  | 5  | -1.33 | 139.84 | -1.89 | -0.84 | 0.57 | 1 | 0.55 |
| 38 | Melatonin                    | 232.28 | 5  | 1.59  | 54.12  | 1.86  | -2.34 | 0.31 | 0 | 0.55 |
| 39 | Hydroxytyrosol               | 154.16 | 2  | -0.72 | 60.69  | 0.63  | -0.61 | 0.25 | 0 | 0.55 |

(Lipophilicity: XLOGP3 between -0.7 and +5.0, size: MW between 150 and 500 g/mol, polarity: TPSA between 20 and 130Å, solubility: log S not higher than 6, saturation: fraction of carbons in the sp<sup>3</sup> hybridization not less than 0.25, and flexibility: no more than nine rotatable bonds; topological polar surface area (TPSA))

**Table S2.** Pharmacokinetics properties of selected compounds

| No. | Molecule                 | GI absorption | BBB permeant | P-gp substrate | CYP1A2 inhibitor | CYP2C19 inhibitor | CYP2C9 inhibitor | CYP2D6 inhibitor | CYP3A4 inhibitor | log Kp (cm/s) skin permeation |
|-----|--------------------------|---------------|--------------|----------------|------------------|-------------------|------------------|------------------|------------------|-------------------------------|
| 1   | 3-p-Coumaroylquinic acid | Low           | No           | No             | No               | No                | No               | No               | No               | -8.41                         |
| 2   | Caffeic acid             | High          | No           | No             | No               | No                | No               | No               | No               | -6.58                         |
| 3   | Chlorogenic acid         | Low           | No           | No             | No               | No                | No               | No               | No               | -8.76                         |
| 4   | Cinnamic acid            | High          | Yes          | No             | No               | No                | No               | No               | No               | -5.69                         |
| 5   | Ellagic acid             | High          | No           | No             | Yes              | No                | No               | No               | No               | -7.36                         |
| 6   | Ferulic acid             | High          | Yes          | No             | No               | No                | No               | No               | No               | -6.41                         |
| 7   | p-Coumaric acid          | High          | Yes          | No             | No               | No                | No               | No               | No               | -6.26                         |
| 8   | p-Hydroxybenzoic acid    | High          | Yes          | No             | No               | No                | No               | No               | No               | -6.02                         |
| 9   | Protocatechuic acid      | High          | No           | No             | No               | No                | No               | No               | Yes              | -6.42                         |
| 10  | Quinic acid              | Low           | No           | Yes            | No               | No                | No               | No               | No               | -9.15                         |
| 11  | Syringic acid            | High          | No           | No             | No               | No                | No               | No               | No               | -6.77                         |
| 12  | Cyanidin                 | High          | No           | Yes            | Yes              | No                | No               | No               | No               | -7.51                         |
| 13  | Cyanidin 3-O-rutinoside  | Low           | No           | No             | No               | No                | No               | No               | No               | -11.84                        |
| 14  | Cyanidin 3-O-glucoside   | Low           | No           | No             | No               | No                | No               | No               | No               | -8.94                         |
| 15  | Delphinidin              | High          | No           | Yes            | Yes              | No                | No               | No               | No               | -7.86                         |
| 16  | Chrysin                  | High          | Yes          | No             | Yes              | No                | No               | Yes              | Yes              | -5.35                         |
| 17  | Diosmin                  | Low           | No           | Yes            | No               | No                | No               | No               | No               | -9.91                         |
| 18  | Epicatechin              | High          | No           | Yes            | No               | No                | No               | No               | No               | -7.82                         |
| 19  | Isorhamnetin             | High          | No           | No             | Yes              | No                | No               | Yes              | Yes              | -6.9                          |
| 20  | Luteolin                 | High          | No           | No             | Yes              | No                | No               | Yes              | Yes              | -6.25                         |
| 21  | Naringin                 | Low           | No           | Yes            | No               | No                | No               | No               | No               | -10.15                        |
| 22  | Quercetin                | High          | No           | No             | Yes              | No                | No               | Yes              | Yes              | -7.05                         |
| 23  | Quercetin-3-glucoside    | Low           | No           | No             | No               | No                | No               | No               | No               | -8.88                         |
| 24  | Taxifolin                | High          | No           | No             | No               | No                | No               | No               | No               | -7.48                         |
| 25  | Rutin                    | Low           | No           | Yes            | No               | No                | No               | No               | No               | -10.26                        |
| 26  | Coumarin                 | High          | Yes          | No             | Yes              | No                | No               | No               | No               | -6.2                          |
| 27  | Pyrogallol               | High          | Yes          | No             | No               | No                | No               | No               | Yes              | -6.7                          |
| 28  | Corosolic acid           | High          | No           | Yes            | No               | No                | No               | No               | No               | -4.66                         |
| 29  | Hesperidin               | Low           | No           | Yes            | No               | No                | No               | No               | No               | -10.12                        |
| 30  | Neohesperidin            | Low           | No           | Yes            | No               | No                | No               | No               | No               | -10.51                        |
| 31  | Tricin                   | High          | No           | No             | Yes              | No                | Yes              | Yes              | Yes              | -6.14                         |
| 32  | Quercitrin               | Low           | No           | No             | No               | No                | No               | No               | No               | -8.42                         |
| 33  | Naringenin               | High          | No           | Yes            | Yes              | No                | No               | No               | Yes              | -6.17                         |
| 34  | Eriodictyol              | High          | No           | Yes            | No               | No                | No               | No               | Yes              | -6.62                         |



[illegible]

**Table S3.** Predicted absorption and distribution of selected compounds.

| No. | Compounds                         | Absorption       |                    |                               |                   |               |                 | Distribution     |              |                          |                  |                  |
|-----|-----------------------------------|------------------|--------------------|-------------------------------|-------------------|---------------|-----------------|------------------|--------------|--------------------------|------------------|------------------|
|     |                                   | Water solubility | Caco2 permeability | Intestinal absorption (human) | Skin Permeability | P-g substrate | P-g I inhibitor | P-g II inhibitor | VDss (human) | Fraction unbound (human) | BBB permeability | CNS permeability |
| 1   | 3- <i>p</i> -Coumaroylquinic acid | -1.99            | -0.66              | 43.93                         | -2.74             | Yes           | No              | No               | 0.03         | 0.61                     | -1.16            | -3.69            |
| 2   | Caffeic acid                      | -2.33            | 0.63               | 69.41                         | -2.72             | No            | No              | No               | -1.10        | 0.53                     | -0.65            | -2.61            |
| 3   | Chlorogenic acid                  | -2.45            | -0.84              | 36.38                         | -2.74             | Yes           | No              | No               | 0.58         | 0.66                     | -1.41            | -3.86            |
| 4   | Cinnamic acid                     | -2.61            | 1.72               | 94.83                         | -2.70             | No            | No              | No               | -1.05        | 0.38                     | 0.45             | -1.83            |
| 5   | Ellagic acid                      | -3.18            | 0.34               | 86.68                         | -2.74             | Yes           | No              | No               | 0.38         | 0.08                     | -1.27            | -3.53            |
| 6   | Ferulic acid                      | -2.82            | 0.18               | 93.69                         | -2.72             | No            | No              | No               | -1.37        | 0.34                     | -0.24            | -2.61            |
| 7   | <i>p</i> -Coumaric acid           | -2.38            | 1.21               | 93.49                         | -2.72             | No            | No              | No               | -1.15        | 0.43                     | -0.23            | -2.42            |
| 8   | <i>p</i> -Hydroxybenzoic acid     | -1.88            | 1.15               | 83.96                         | -2.72             | No            | No              | No               | -1.56        | 0.59                     | -0.33            | -3.21            |
| 9   | Protocatechuic acid               | -2.07            | 0.49               | 71.17                         | -2.73             | No            | No              | No               | -1.30        | 0.65                     | -0.68            | -3.31            |
| 10  | Quinic acid                       | -1.12            | -0.26              | 32.27                         | -2.74             | No            | No              | No               | -0.22        | 0.82                     | -0.89            | -3.67            |
| 11  | Syringic acid                     | -2.22            | 0.50               | 73.08                         | -2.74             | Yes           | No              | No               | -1.44        | 0.60                     | -0.19            | -2.70            |
| 12  | Cyanidin                          | -2.94            | -0.35              | 87.30                         | -2.74             | Yes           | No              | No               | 0.95         | 0.24                     | -1.23            | -2.22            |
| 13  | Cyanidin 3-O-rutinoside           | -2.89            | -1.09              | 23.05                         | -2.74             | Yes           | No              | Yes              | 1.94         | 0.18                     | -2.15            | -4.94            |
| 14  | Cyanidin 3-O-glucoside            | -2.93            | 0.06               | 45.39                         | -2.74             | Yes           | No              | No               | 1.46         | 0.27                     | -1.71            | -3.81            |
| 15  | Delphinidin                       | -2.92            | -0.83              | 77.39                         | -2.74             | Yes           | No              | No               | 0.86         | 0.31                     | -1.62            | -3.52            |
| 16  | Chrysin                           | -3.54            | 0.95               | 93.76                         | -2.74             | Yes           | No              | No               | 0.40         | 0.14                     | 0.05             | -1.91            |
| 17  | Diosmin                           | -2.93            | 0.31               | 29.32                         | -2.74             | Yes           | No              | No               | 1.43         | 0.11                     | -1.80            | -4.84            |
| 18  | Epicatechin                       | -3.12            | -0.28              | 68.83                         | -2.74             | Yes           | No              | No               | 1.03         | 0.24                     | -1.05            | -3.30            |
| 19  | Isorhamnetin                      | -3.00            | 0.00               | 76.01                         | -2.74             | Yes           | No              | No               | 1.12         | 0.09                     | -1.14            | -3.19            |
| 20  | Luteolin                          | -3.09            | 0.10               | 81.13                         | -2.74             | Yes           | No              | No               | 1.15         | 0.17                     | -0.91            | -2.25            |
| 21  | Naringin                          | -2.92            | -0.66              | 25.80                         | -2.74             | Yes           | No              | No               | 0.62         | 0.16                     | -1.60            | -4.77            |
| 22  | Quercetin                         | -2.93            | -0.23              | 77.21                         | -2.74             | Yes           | No              | No               | 1.56         | 0.21                     | -1.10            | -3.07            |
| 23  | Quercetin-3-glucoside             | -2.93            | 0.24               | 48.00                         | -2.74             | Yes           | No              | No               | 1.85         | 0.23                     | -1.69            | -4.09            |
| 24  | Taxifolin                         | -3.04            | 0.92               | 64.71                         | -2.74             | Yes           | No              | No               | 1.64         | 0.32                     | -0.73            | -3.20            |
| 25  | Rutin                             | -2.89            | -0.95              | 23.45                         | -2.74             | Yes           | No              | No               | 1.66         | 0.19                     | -1.90            | -5.18            |
| 26  | Coumarin                          | -1.52            | 1.65               | 97.34                         | -1.92             | No            | No              | No               | -0.14        | 0.37                     | -0.01            | -1.93            |
| 27  | Pyrogallol                        | -1.41            | 1.12               | 83.55                         | -2.75             | No            | No              | No               | 0.13         | 0.71                     | -0.44            | -3.25            |
| 28  | Corosolic acid                    | -3.04            | 0.64               | 100.00                        | -2.74             | No            | No              | No               | -1.28        | 0.04                     | -0.47            | -1.51            |
| 29  | Hesperidin                        | -3.01            | 0.51               | 31.48                         | -2.74             | Yes           | No              | No               | 1.00         | 0.10                     | -1.72            | -4.81            |
| 30  | Neohesperidin                     | -2.90            | -0.86              | 16.14                         | -2.74             | Yes           | No              | No               | 0.83         | 0.18                     | -1.84            | -4.93            |

|    |                              |       |       |       |       |     |    |    |       |      |       |       |
|----|------------------------------|-------|-------|-------|-------|-----|----|----|-------|------|-------|-------|
| 31 | Tricin                       | -3.28 | 0.12  | 89.71 | -2.74 | Yes | No | No | 0.80  | 0.08 | -1.12 | -3.41 |
| 32 | Quercitrin                   | -2.90 | 0.05  | 52.71 | -2.74 | Yes | No | No | 1.52  | 0.13 | -1.50 | -4.16 |
| 33 | Naringenin                   | -3.22 | 1.03  | 91.31 | -2.74 | Yes | No | No | -0.02 | 0.06 | -0.58 | -2.22 |
| 34 | Eriodictyol                  | -3.25 | -0.09 | 74.69 | -2.74 | Yes | No | No | 0.38  | 0.11 | -0.83 | -3.14 |
| 35 | Linoleic acid                | -5.86 | 1.57  | 92.33 | -2.72 | No  | No | No | -0.59 | 0.05 | -0.14 | -1.60 |
| 36 | Oleic acid                   | -5.9  | 1.56  | 91.83 | -2.72 | No  | No | No | -0.59 | 0.05 | -0.17 | -1.65 |
| 37 | Hydroxytyrosol 4-O-glucoside | -1.52 | 0.05  | 38.53 | -2.73 | No  | No | No | -0.31 | 0.73 | -1.15 | -4.10 |
| 38 | Melatonin                    | -2.47 | 1.22  | 94.16 | -2.83 | Yes | No | No | 0.08  | 0.29 | -0.08 | -2.45 |
| 39 | Hydroxytyrosol               | -1.14 | 1.10  | 72.81 | -2.89 | No  | No | No | -0.08 | 0.59 | -0.39 | -2.67 |

Intestinal absorption (human) (IA), P-glycoprotein substrate, P-glycoprotein I inhibitor, P-glycoprotein II inhibitor, Water solubility (log mol/L) (WS), Volume of distributions (VDss); blood-brain barrier (BBB); central nervous system (CNS)

**Interpretation of results:** If the Caco2 permeability value is higher than 0.90, a compound has a high Caco-2 permeability. A compound with a value of less than 30% is poorly absorbed in the human intestinal. If a compound has a value less than -2.5 is considered to have a low skin permeability. The compounds with values < -3 cannot penetrate the central nervous system, while values > -2 are considered to penetrate the central nervous system. The compounds with values logBB < -1 are poorly distributed to the brain while values logBB > 0.3 are considered to cross the blood-brain barrier readily. VDss is considered low if below 0.71 L/kg (log VDss < -0.15) and high if above 2.81 L/kg (log VDss > 0.45).



|    |                              |    |     |     |    |    |    |    |       |    |
|----|------------------------------|----|-----|-----|----|----|----|----|-------|----|
| 33 | Naringenin                   | No | No  | Yes | No | No | No | No | 0.06  | No |
| 34 | Eriodictyol                  | No | No  | No  | No | No | No | No | -0.01 | No |
| 35 | Linoleic acid                | No | Yes | Yes | No | No | No | No | 1.94  | No |
| 36 | Oleic acid                   | No | Yes | Yes | No | No | No | No | 1.89  | No |
| 37 | Hydroxytyrosol 4-O-glucoside | No | No  | No  | No | No | No | No | 0.21  | No |
| 38 | Melatonin                    | No | No  | Yes | No | No | No | No | 0.74  | No |
| 39 | Hydroxytyrosol               | No | No  | No  | No | No | No | No | 0.23  | No |

Organic cation transporter 2 (OCT2)

**Table S5.** Predicted toxicity of abundant phenolic compounds

| No. | Compounds                         | AMES toxicity | MTD-H | hERG I inhibitor | hERG II inhibitor | ORAT (LD50) | LOAEL | Hepatotoxicity | Skin Sensitization | <i>T. pyriformis</i> toxicity | Minnow toxicity |
|-----|-----------------------------------|---------------|-------|------------------|-------------------|-------------|-------|----------------|--------------------|-------------------------------|-----------------|
| 1   | 3- <i>p</i> -Coumaroylquinic acid | No            | -0.09 | No               | No                | 1.74        | 2.51  | No             | No                 | 0.29                          | 4.61            |
| 2   | Caffeic acid                      | No            | 1.15  | No               | No                | 2.38        | 2.09  | No             | No                 | 0.29                          | 2.25            |
| 3   | Chlorogenic acid                  | No            | -0.13 | No               | No                | 1.97        | 2.98  | No             | No                 | 0.29                          | 5.74            |
| 4   | Cinnamic acid                     | No            | 1.11  | No               | No                | 2.09        | 2.65  | No             | No                 | 0.25                          | 1.72            |
| 5   | Ellagic acid                      | No            | 0.48  | No               | No                | 2.40        | 2.70  | No             | No                 | 0.30                          | 2.11            |
| 6   | Ferulic acid                      | No            | 1.08  | No               | No                | 2.28        | 2.07  | No             | No                 | 0.27                          | 1.83            |
| 7   | <i>p</i> -Coumaric acid           | No            | 1.11  | No               | No                | 2.16        | 2.53  | No             | No                 | 0.32                          | 1.61            |
| 8   | <i>p</i> -Hydroxybenzoic acid     | No            | 0.85  | No               | No                | 2.26        | 2.48  | No             | No                 | 0.27                          | 1.81            |
| 9   | Protocatechuic acid               | No            | 0.81  | No               | No                | 2.42        | 2.02  | No             | No                 | 0.27                          | 2.45            |
| 10  | Quinic acid                       | No            | 1.63  | No               | No                | 1.13        | 3.53  | No             | No                 | 0.29                          | 4.87            |
| 11  | Syringic acid                     | No            | 1.37  | No               | No                | 2.16        | 2.42  | No             | No                 | 0.28                          | 2.55            |
| 12  | Cyanidin                          | No            | 0.50  | No               | No                | 2.46        | 2.54  | No             | No                 | 0.29                          | 2.55            |
| 13  | Cyanidin 3-O-rutinoside           | No            | 0.46  | No               | Yes               | 2.50        | 3.29  | No             | No                 | 0.29                          | 5.70            |
| 14  | Cyanidin 3-O-glucoside            | No            | 0.56  | No               | Yes               | 2.55        | 4.20  | No             | No                 | 0.29                          | 6.40            |
| 15  | Delphinidin                       | No            | 0.51  | No               | No                | 2.55        | 2.93  | No             | No                 | 0.29                          | 3.31            |
| 16  | Chrysin                           | No            | 0.02  | No               | No                | 2.29        | 0.96  | No             | No                 | 0.54                          | 1.75            |
| 17  | Diosmin                           | No            | 0.57  | No               | Yes               | 2.51        | 3.34  | No             | No                 | 0.29                          | 5.35            |
| 18  | Epicatechin                       | No            | 0.44  | No               | No                | 2.43        | 2.50  | No             | No                 | 0.35                          | 3.59            |
| 19  | Isorhamnetin                      | No            | 0.58  | No               | No                | 2.41        | 2.50  | No             | No                 | 0.30                          | 2.21            |
| 20  | Luteolin                          | No            | 0.50  | No               | No                | 2.46        | 2.41  | No             | No                 | 0.33                          | 3.17            |

|    |                              |     |       |    |     |      |      |     |     |       |       |
|----|------------------------------|-----|-------|----|-----|------|------|-----|-----|-------|-------|
| 21 | Naringin                     | No  | 0.43  | No | Yes | 2.50 | 4.20 | No  | No  | 0.29  | 6.04  |
| 22 | Quercetin                    | No  | 0.50  | No | No  | 2.47 | 2.61 | No  | No  | 0.29  | 3.72  |
| 23 | Quercetin-3-glucoside        | No  | 0.57  | No | Yes | 2.54 | 4.42 | No  | No  | 0.29  | 8.06  |
| 24 | Taxifolin                    | No  | 0.35  | No | No  | 2.26 | 3.10 | No  | No  | 0.29  | 4.69  |
| 25 | Rutin                        | No  | 0.45  | No | Yes | 2.49 | 3.67 | No  | No  | 0.29  | 7.68  |
| 26 | Coumarin                     | No  | 0.44  | No | No  | 2.11 | 1.90 | No  | No  | 0.37  | 1.56  |
| 27 | Pyrogallol                   | No  | -0.27 | No | No  | 2.05 | 2.37 | No  | No  | 0.13  | 2.73  |
| 28 | Corosolic acid               | No  | 0.12  | No | No  | 2.51 | 1.86 | Yes | No  | 0.29  | 0.28  |
| 29 | Hesperidin                   | No  | 0.53  | No | Yes | 2.51 | 3.17 | No  | No  | 0.29  | 7.13  |
| 30 | Neohesperidin                | No  | 0.48  | No | Yes | 2.49 | 4.39 | No  | No  | 0.29  | 6.98  |
| 31 | Tricin                       | No  | 0.35  | No | No  | 2.23 | 1.82 | No  | No  | 0.33  | 1.75  |
| 32 | Quercitrin                   | No  | 0.50  | No | No  | 2.59 | 3.02 | No  | No  | 0.29  | 4.95  |
| 33 | Naringenin                   | No  | -0.18 | No | No  | 1.79 | 1.94 | No  | No  | 0.37  | 2.14  |
| 34 | Eriodictyol                  | No  | 0.01  | No | No  | 2.03 | 2.48 | No  | No  | 0.33  | 2.97  |
| 35 | Linoleic acid                | No  | -0.83 | No | No  | 1.43 | 3.19 | Yes | Yes | 0.70  | -1.31 |
| 36 | Oleic acid                   | No  | -0.81 | No | No  | 1.42 | 3.23 | No  | Yes | 0.68  | -1.44 |
| 37 | Hydroxytyrosol 4-O-glucoside | Yes | 0.70  | No | No  | 2.11 | 3.65 | No  | No  | 0.29  | 5.33  |
| 38 | Melatonin                    | No  | 0.15  | No | No  | 2.16 | 2.45 | No  | No  | 0.75  | 1.41  |
| 39 | Hydroxytyrosol               | Yes | 1.15  | No | No  | 1.86 | 1.91 | No  | No  | -0.13 | 2.75  |

Oral Rat Acute Toxicity (ORAT), Oral Rat Chronic Toxicity (LOAEL), Max. tolerated dose (human) (MTD-H)

Explanations

Minnow toxicity

LC50 values below 0.5mM (log LC50 < -0.3) are regarded as high acute toxicity.

T. Pyriformis toxicity

pIGC50 (negative logarithm of the concentration required to inhibit 50% growth in log µg/L) is considered, with a value > -0.5 log µg/L is considered toxic.

AMES toxicity: if the AMES value is positive, the compound will be mutagenic.

Maximum tolerated dose: a value less than is equal to 0.477 log(mg/kg/day) is considered low and high if greater than 0.477 log(mg/kg/day).
